# Supplementary material for: Synthesis, Characterization and Application of Novel Cationic Surfactants as Antibacterial Agents
Source: MDPI journal article supplement (doi:10.3390/separations10020097), 2023-02-01
Supplement: s1 [file s1]

Archive with 1 entries (1 files):
- separations-2093861-supplementary.pdf
