# Supplementary material for: Synthesis, Characterization and Application of Novel Cationic Surfactants as Antibacterial Agents
Source: MDPI journal article supplement (doi:10.3390/separations10020097), 2023-02-01
Supplement: s1 [file s1 › separations-2093861-supplementary.pdf]

# Synthesis, Characterization and Application of novel Cationic Surfactants as Antibacterial Agents

Shaban R. M. Sayed <sup>1\*</sup>, Abdelrahman O. Ezzat <sup>2</sup>, Mohamed Taha Yassin <sup>1</sup> and Ashraf M. M. Abdelbacki <sup>3</sup>

<sup>1</sup> Department of Botany and Microbiology, College of Science, King Saud University, P.O. Box 2455, Riyadh 11451, Saudi Arabia; myassin2.c@ksu.edu.sa (M.T.Y.)

<sup>2</sup> Department of Chemistry, College of Science, King Saud University, P.O. Box 2455, Riyadh 11451, Saudi Arabia; aezzat@ksu.edu.sa (A.O.E.)

<sup>3</sup> Department of Administrative and Social Sciences, College of Applied Studies and Community Service, King Saud University, P.O. Box 22459, Riyadh 11495, Saudi Arabia; aabdelbacki@ksu.edu.sa (A.M.M.A)

\* Correspondence: shmohamed@ksu.edu.sa (S.R.M.S.)

**Citation:** Shaban R. M. Sayed; Ezzat A.O.; Yassin, M.T.; Ashraf M. M. Abdelbacki Synthesis and Characterization of New Cationic Surfactants Based on Quaternary Hexamethylenetetramine as Antibacterial Agents. *Separations* **2022**, *9*, x. <https://doi.org/10.3390/xxxxx>

Academic Editor(s):

Received: date

Accepted: date

Published: date

**Publisher's Note:** MDPI stays neutral with regard to jurisdictional claims in published maps and institutional affiliations.

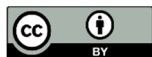

**Copyright:** © 2022 by the authors. Submitted for possible open access publication under the terms and conditions of the Creative Commons Attribution (CC BY) license (<https://creativecommons.org/licenses/by/4.0/>).

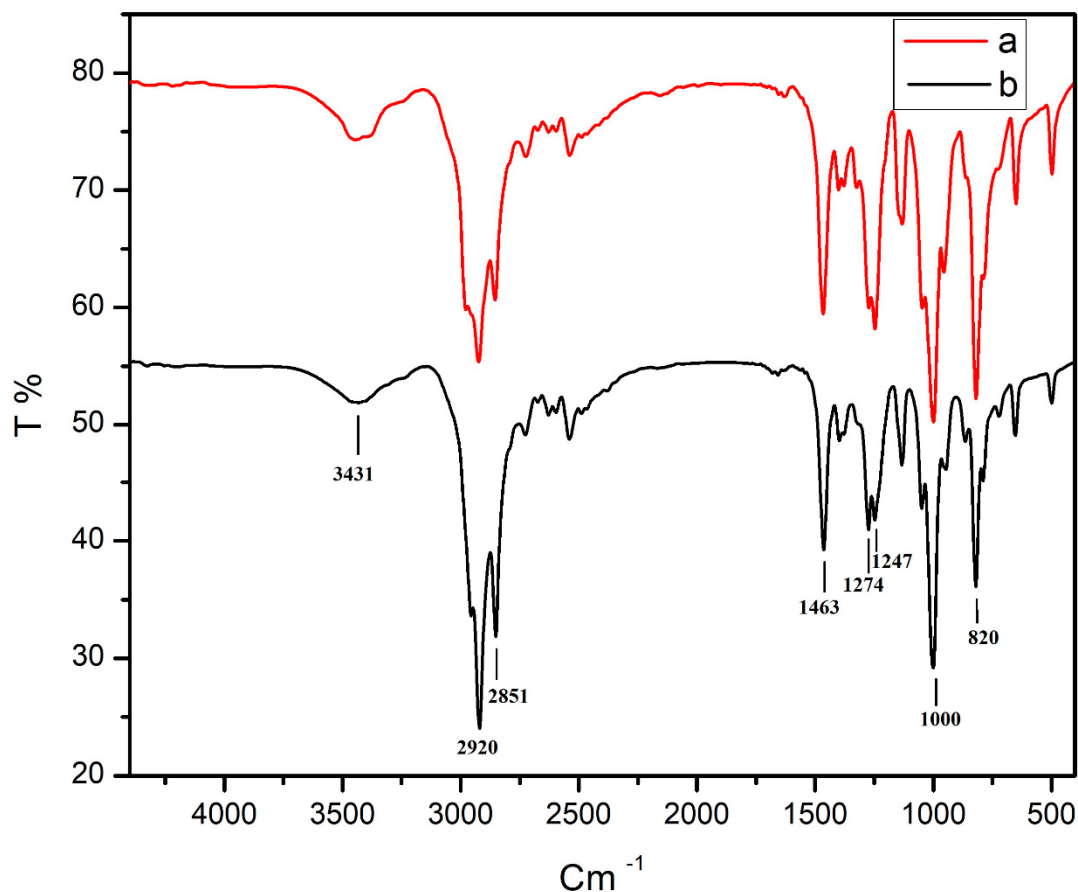

Figure S1. FTIR spectra of a) QHETA-9 and b) QHETA-14.

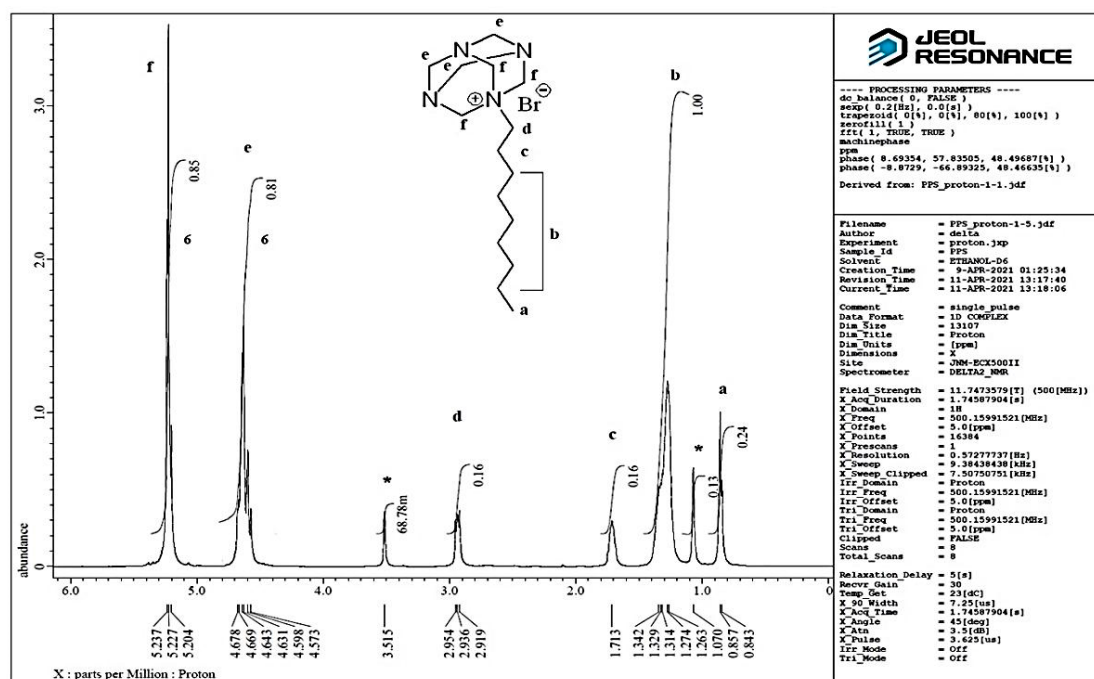

Figure S2. <sup>1</sup>H NMR spectra of QHETA-9. (500 MHz, Ethanol-d<sub>6</sub>)

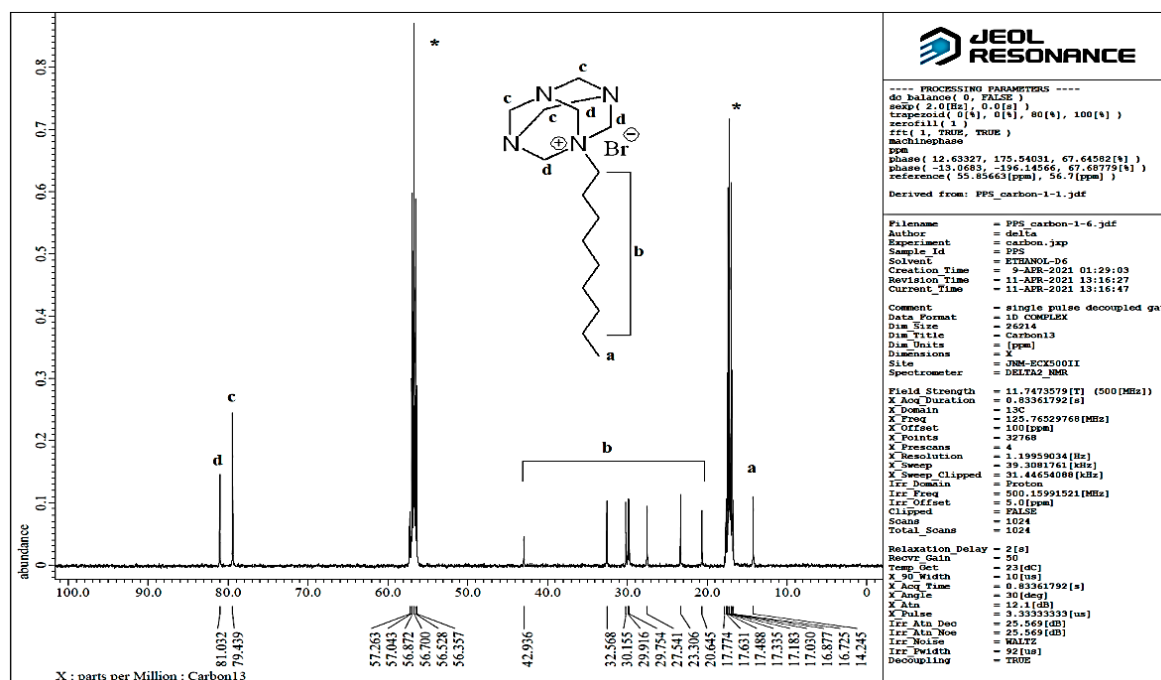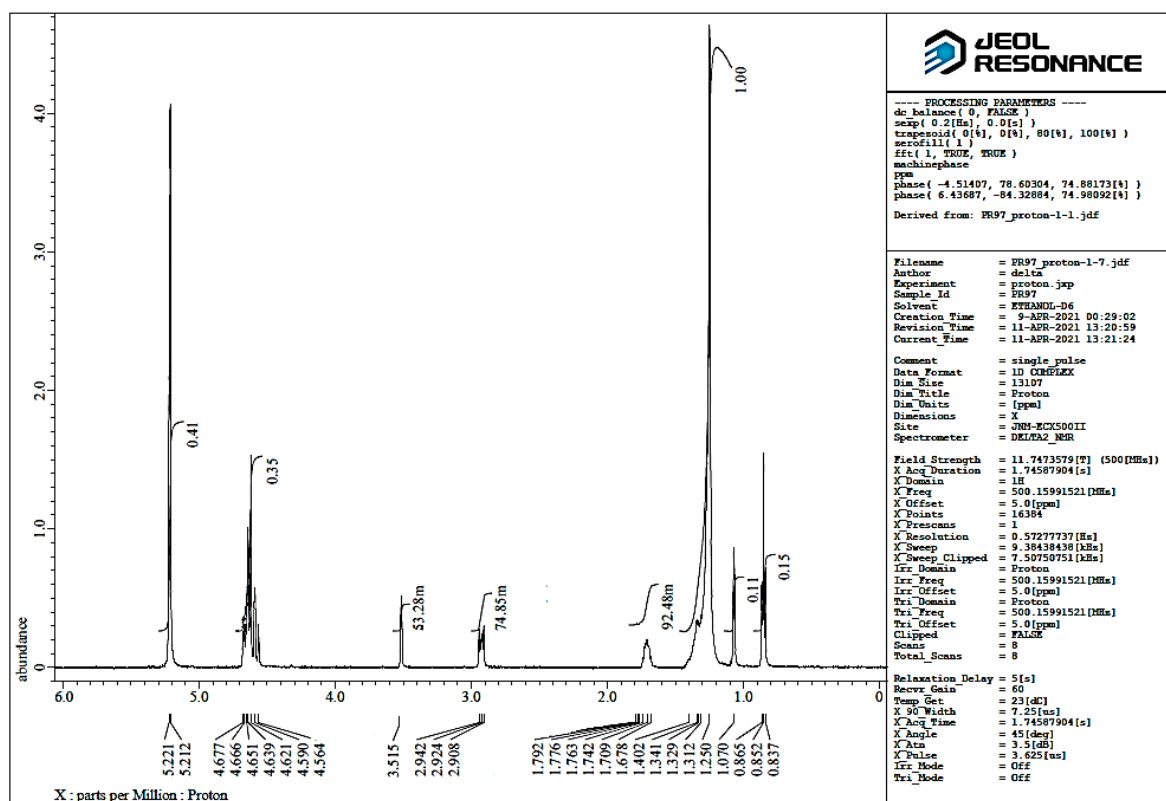

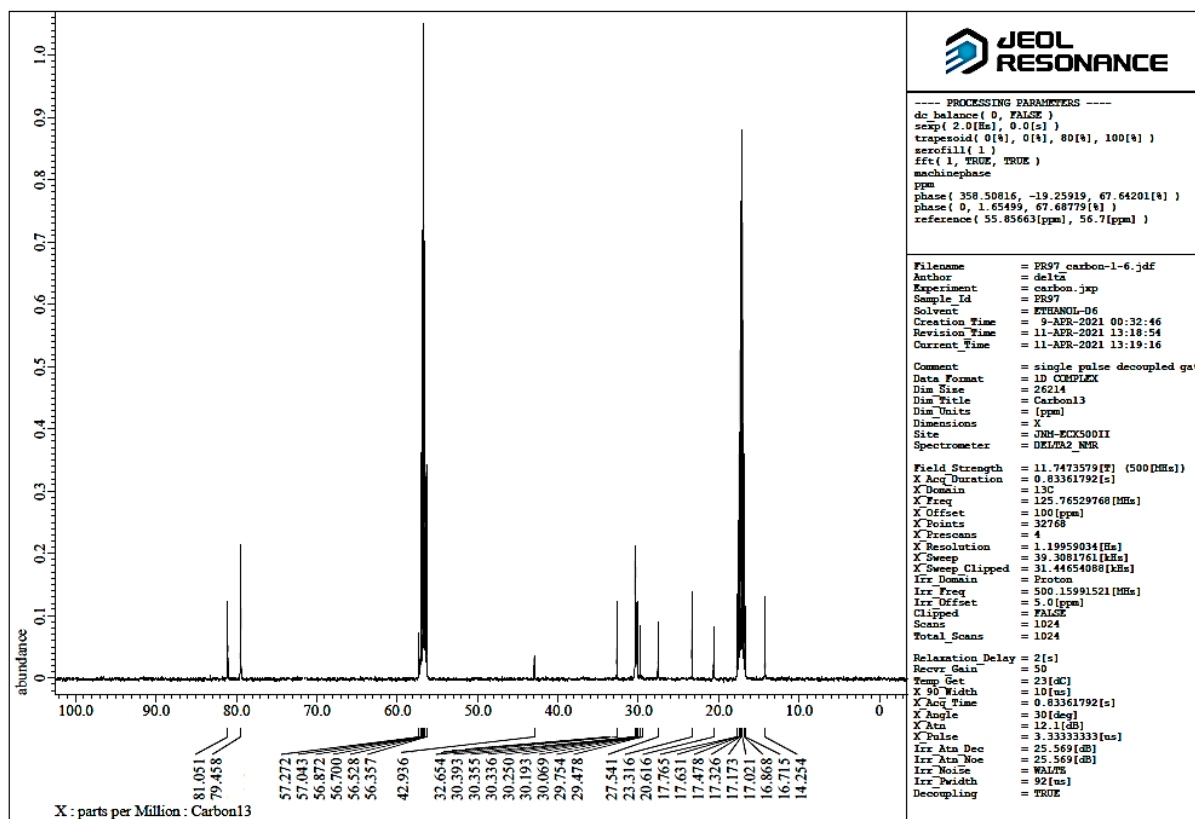

Figure S5.  $^{13}\text{C}$  NMR spectra of QHETA-14 (125 MHz, Ethanol- $d_6$ ).

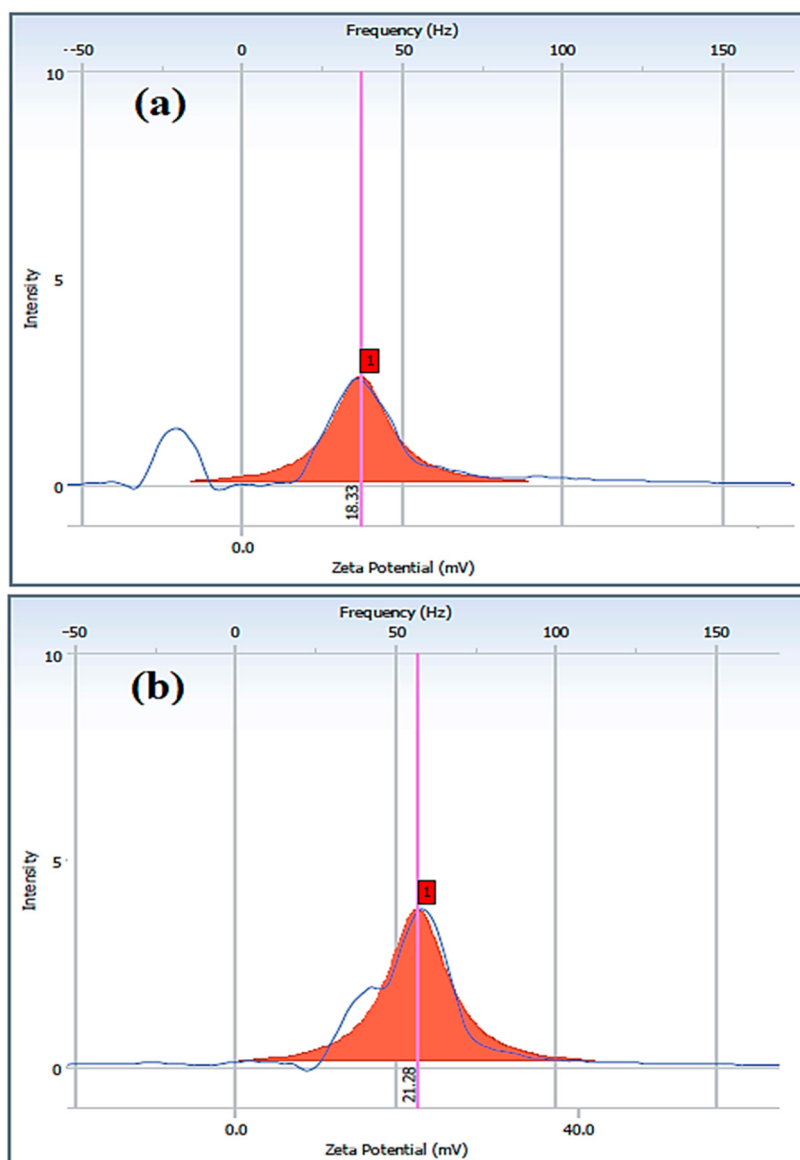

**Figure S6.** Zeta potential measurements of a) QHETA-14 and b) QHETA-9.

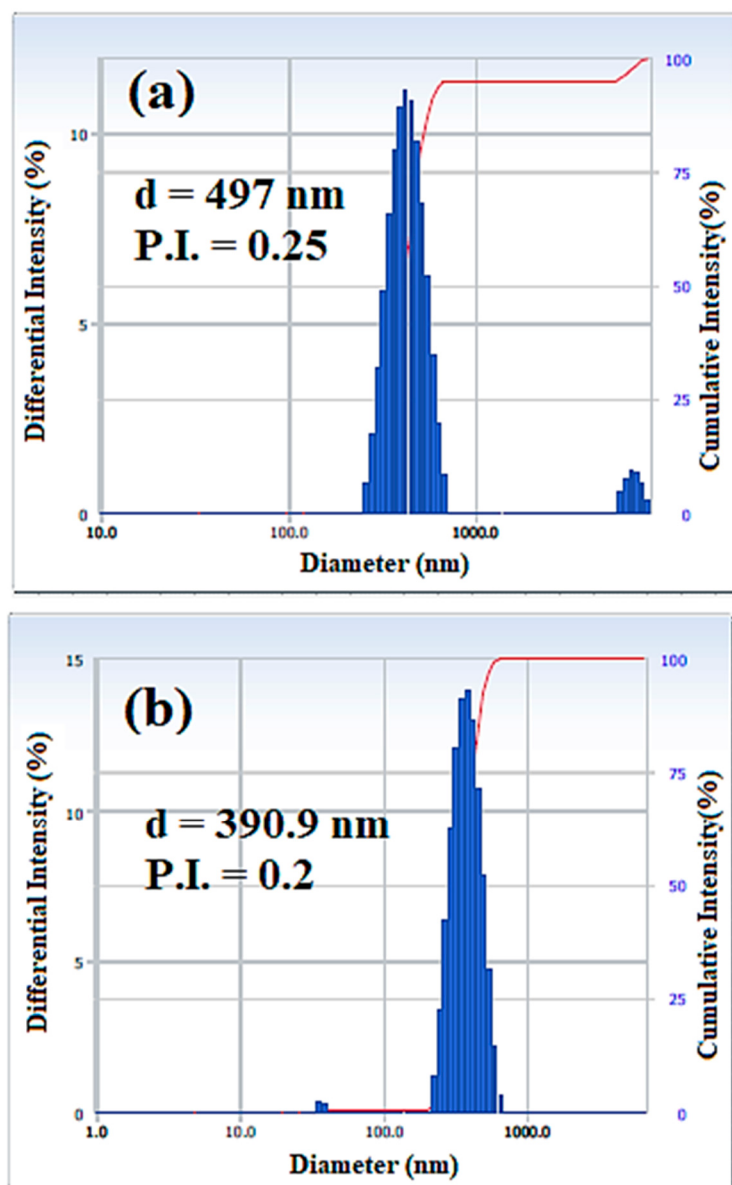

Figure S7. Particle size distributions of a) QHETA-14 and b) QHETA-9 at their cmc and at 25 °C.

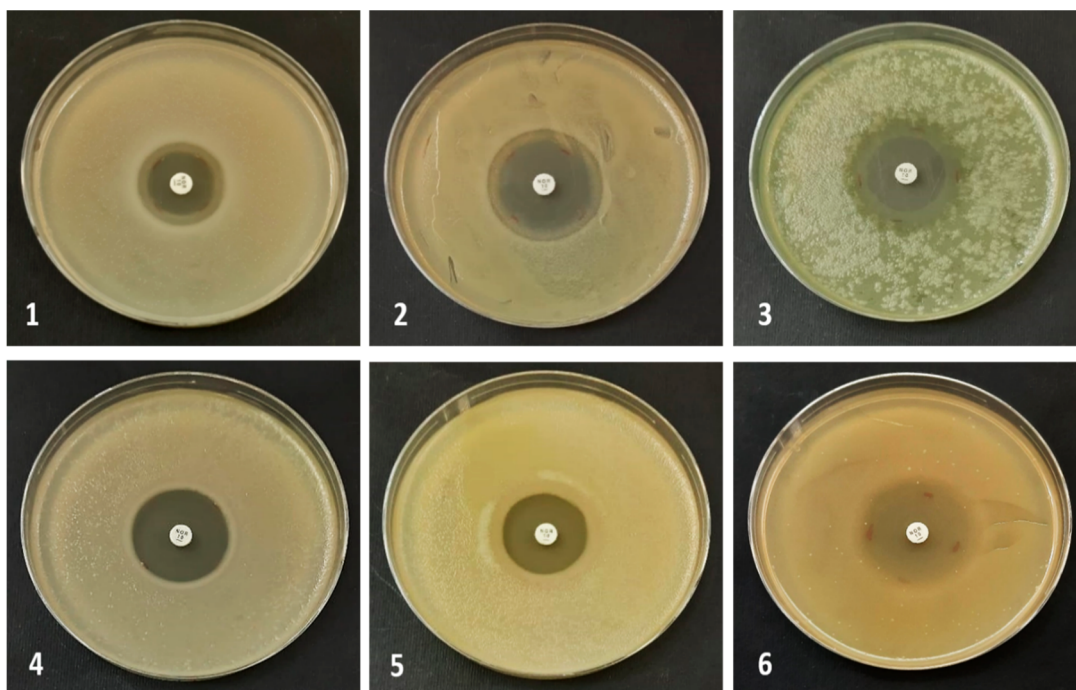

**Figure S8.** Effect of the antibiotic Norfloxacin 10 µg concentration as standard material on bacterial growth of bacteria strains including: *S. aureus* (1), MRSA (2), *E. faecalis* (3), *A. tumefaciens* (4), *E. carotovora* (5) and *E. coli* (6).
